# Supplementary material for: Anti-Cancer Mechanisms of Diarylpentanoid MS17 (1,5-Bis(2-hydroxyphenyl)-1,4-pentadiene-3-one) in Human Colon Cancer Cells: A Proteomics Approach
Source: MDPI journal article supplement (doi:10.3390/ijms25063503), 2024-03-20
Supplement: s1 [file s1]

**Supplementary Table S1.** EC<sub>50</sub> values of MS17 and curcumin in colon cancer cell lines (SW480 and SW620) and lung fibroblast WI38 cells. Curcumin was used as a positive control. The results were shown as mean ± SEM from three independent experiments.

| Cell Line | EC <sub>50</sub> values of compound (μM) |             | Selective Index |          |
|-----------|------------------------------------------|-------------|-----------------|----------|
|           | MS17                                     | Curcumin    | MS17            | Curcumin |
| SW480     | 4.1 ± 0.38                               | 17.5 ± 2.36 | 119.5           | 147.4    |
| SW620     | 2.5 ± 0.10                               | 13.1 ± 0.23 | 196             | 196.9    |
| WI38      | 4.9 ± 0.29                               | 25.8 ± 0.92 |                 |          |

**Supplementary Table S2.** 24 upregulated DEPs in MS17-treated SW480 cells upon 8.2 μM treatment for 24 hours.

| Protein Class/ Protein Name                    | Accession Number | Protein Symbol/ Gene Symbol | Significance (-10LogP) | Coverage (%) | #Peptides | #Unique | Group Profile (Ratio) | Avg. Mass |
|------------------------------------------------|------------------|-----------------------------|------------------------|--------------|-----------|---------|-----------------------|-----------|
| <i>Calcium signaling</i>                       |                  |                             |                        |              |           |         |                       |           |
| Protein S100-A6                                | P06703           | S10A6/S100A6                | 13.24                  | 64           | 6         | 6       | 1.00:1.32             | 10180     |
| <i>Cytoskeletal protein</i>                    |                  |                             |                        |              |           |         |                       |           |
| Actin cytoplasmic 1                            | P60709*          | ACTB/ ACTB                  | 13.2                   | 5            | 1         | 1       | 1.00:1.32             | 41737     |
| <i>Chaperones</i>                              |                  |                             |                        |              |           |         |                       |           |
| Endoplasmic reticulum chaperone BiP            | P11021           | BIP/HSPA5                   | 20.3                   | 29           | 17        | 17      | 1.00:1.54             | 72333     |
| 10 kDa heat shock protein mitochondrial        | P61604           | CH10/HSPE1                  | 47.7                   | 55           | 6         | 6       | 1.00:2.68             | 10932     |
| Heat shock 70 kDa protein 1A                   | P0DMV8*          | HS71A/HSPA1A                | 77.24                  | 16           | 8         | 8       | 1.00:9.15             | 70052     |
| Heat shock 70 kDa protein 1B                   | P0DMV9*          | HS71B/HSPA1B                | 77.24                  | 16           | 8         | 8       | 1.00:9.15             | 70052     |
| Heat shock protein HSP 90-alpha                | P07900           | HS90A/ HSP90AA1             | 106.5                  | 19           | 14        | 14      | 1.00:2.48             | 84660     |
| Heat shock protein HSP 90-alpha A2             | Q14568           | HS902/ HSP90AA2P            | 106.5                  | 10           | 3         | 3       | 1.00:2.17             | 39365     |
| Heat shock protein HSP 90-alpha A4             | Q58FG1           | HS904/ HSP90AA4P            | 106.5                  | 5            | 2         | 2       | 1.00:1.81             | 47712     |
| Serpin H1                                      | P50454           | SERPINH1/ SERPINH1          | 18.71                  | 13           | 4         | 4       | 1.00:2.40             | 46441     |
| <i>Chromatin-regulatory</i>                    |                  |                             |                        |              |           |         |                       |           |
| Putative high mobility group protein B1-like 1 | B2RPK0           | HGB1A/ HMGB1P1              | 15.28                  | 7            | 2         | 2       | 1.00:1.98             | 24238     |
| High mobility group protein B1                 | P09429           | HMGB1/ HMGB1                | 15.28                  | 7            | 2         | 2       | 1.00:1.98             | 24894     |
| <i>Metabolic enzyme</i>                        |                  |                             |                        |              |           |         |                       |           |
| Pyruvate kinase PKM                            | P14618           | KPYM/PKM                    | 30.9                   | 44           | 20        | 20      | 1.00:1.44             | 57937     |
| Pyruvate kinase PKLR                           | P30613           | KPYR/PKLR                   | 30.9                   | 2            | 1         | 1       | 1.00:1.36             | 61830     |
| <i>Nuclear membrane protein</i>                |                  |                             |                        |              |           |         |                       |           |
| Neuron navigator 3                             | Q8IVL0           | NAV3/NAV3                   | 47.7                   | 0            | 1         | 1       | 1.00:2.07             | 255646    |



| <i>Ribosomal protein</i>                    |         |              |       |    |   |   |           |        |
|---------------------------------------------|---------|--------------|-------|----|---|---|-----------|--------|
| 60S ribosomal protein L7a                   | P62424* | RL7A/RPL7A   | 36.95 | 19 | 5 | 5 | 1.00:1.48 | 29996  |
| Ubiquitin-40S ribosomal protein S27a        | P62979  | RS27A/RPS27A | 35.92 | 28 | 4 | 4 | 1.00:2.63 | 17965  |
| Ubiquitin-60S ribosomal protein L40         | P62987  | RL40/UBA52   | 35.92 | 39 | 5 | 5 | 1.00:2.63 | 14728  |
| <i>Transport protein</i>                    |         |              |       |    |   |   |           |        |
| ATP-binding cassette sub-family A member 13 | Q86UQ4  | ABCAD/ABCA13 | 106.5 | 0  | 1 | 1 | 1.00:2.00 | 576166 |
| GTP-binding nuclear protein Ran             | P62826  | RAN/RAN      | 14.76 | 25 | 5 | 5 | 1.00:1.34 | 24423  |
| <i>Ubiquitin-protein ligase</i>             |         |              |       |    |   |   |           |        |
| Polyubiquitin-B                             | P0CG47  | UBB/UBB      | 35.92 | 19 | 4 | 4 | 1.00:2.63 | 25762  |
| Polyubiquitin-C                             | P0CG48  | UBC/UBC      | 35.92 | 6  | 4 | 4 | 1.00:2.63 | 77039  |

DEPs with \* overlapped with SW620 cells.

**Supplementary Table S3.** 92 DEPs in MS17-treated SW620 cells upon 5μM treatment for 24 hours.

| Protein Class/<br>Name                  | Protein Accession<br>Number | Protein Symbol/<br>Gene Symbol | Significance<br>(-10LogP) | Coverage<br>(%) | #Peptides | #Unique | Group<br>Profile<br>(Ratio) | Avg.<br>Mass |
|-----------------------------------------|-----------------------------|--------------------------------|---------------------------|-----------------|-----------|---------|-----------------------------|--------------|
| <i>Calcium signaling</i>                |                             |                                |                           |                 |           |         |                             |              |
| Calmodulin-1                            | P0DP23                      | CALM1/CALM1                    | 20.25                     | 36              | 3         | 3       | 1.00:6.06                   | 16838        |
| Calmodulin-2                            | P0DP24                      | CALM2/CALM2                    | 20.25                     | 36              | 3         | 3       | 1.00:6.06                   | 16838        |
| Calmodulin-3                            | P0DP25                      | CALM3/CALM3                    | 20.25                     | 36              | 3         | 3       | 1.00:6.06                   | 16838        |
| Annexin A1                              | P04083                      | ANXA1/ANXA1                    | 51.62                     | 24              | 7         | 7       | 1.00:6.38                   | 38714        |
| Calmodulin-like protein 3               | P27482                      | CALL3/CALML3                   | 20.25                     | 5               | 1         | 1       | 1.00:64.00                  | 16891        |
| <i>Chaperone</i>                        |                             |                                |                           |                 |           |         |                             |              |
| Prefoldin subunit 6                     | O15212                      | PFD6/PFDN6                     | 19.01                     | 6               | 1         | 1       | 1.00:64.00                  | 14583        |
| Heat shock 70 kDa protein 1A            | P0DMV8*                     | HS71A/HSPA1A                   | 20.93                     | 4               | 5         | 5       | 1.00:4.05                   | 70052        |
| Heat shock 70 kDa protein 1B            | P0DMV9*                     | HS71B/HSPA1B                   | 20.93                     | 4               | 5         | 5       | 1.00:4.05                   | 70052        |
| Nucleophosmin                           | P06748                      | NPM/NPM1                       | 15.09                     | 39              | 11        | 11      | 1.00:1.52                   | 32575        |
| Heat shock protein HSP 90-beta          | P08238                      | HS90B/HSP90AB1                 | 142.39                    | 1               | 1         | 1       | 1.00:5.34                   | 83264        |
| Calreticulin                            | P27797                      | CALR/CALR                      | 16.16                     | 4               | 2         | 2       | 1.00:0.73                   | 48142        |
| DnaJ homolog subfamily A member 1       | P31689                      | DNJA1/DNAJA1                   | 38.15                     | 13              | 3         | 3       | 1.00:12.32                  | 44868        |
| Stress-70 protein, mitochondrial        | P38646                      | GRP75/HSPA9                    | 30.79                     | 5               | 3         | 3       | 1.00:0.63                   | 73681        |
| T-complex protein 1 subunit theta       | P50990                      | TCPQ/CCT8                      | 46.29                     | 10              | 6         | 6       | 1.00:1.80                   | 59621        |
| Heat shock protein 75 kDa mitochondrial | Q12931                      | TRAP1/TRAP1                    | 22.03                     | 4               | 1         | 1       | 1.00:15.33                  | 80110        |



|                                             |         |                 |        |    |   |   |            |        |
|---------------------------------------------|---------|-----------------|--------|----|---|---|------------|--------|
| Putative heat shock protein HSP 90-beta-3   | Q58FF7  | H90B3/HSP90AB3P | 142.39 | 2  | 1 | 1 | 1.00:5.34  | 68325  |
| Heat shock protein 105 kDa                  | Q92598  | HS105/HSPH1     | 49.22  | 7  | 5 | 5 | 1.00:64.00 | 96865  |
| Parkinson disease protein 7                 | Q99497  | PARK7/PARK7     | 35.02  | 47 | 8 | 8 | 1.00:1.65  | 19891  |
| T-complex protein 1 subunit eta             | Q99832  | TCPH/CCT7       | 15     | 12 | 6 | 6 | 1.00:2.98  | 59367  |
| <b><i>Chromatin-regulatory</i></b>          |         |                 |        |    |   |   |            |        |
| Histone H1.3                                | P16402  | H13/H1-3        | 13.46  | 7  | 1 | 1 | 1.00:0.21  | 22350  |
| Histone H1.2                                | P16403  | H12/H1-2        | 66.24  | 12 | 2 | 2 | 1.00:0.31  | 21365  |
| <b><i>Cytoskeletal protein</i></b>          |         |                 |        |    |   |   |            |        |
| Keratin type II cytoskeletal 7              | P08729  | K2C7/KRT7       | 28.73  | 4  | 2 | 2 | 1.00:0.09  | 51386  |
| Alpha-actinin-1                             | P12814  | ACTN1/ACTN1     | 29.32  | 4  | 1 | 1 | 1.00:8.84  | 103058 |
| Plastin-2                                   | P13796  | PLSL/LCP1       | 17.67  | 6  | 2 | 2 | 1.00:2.42  | 70289  |
| Stathmin                                    | P16949  | STMN1/STMN1     | 21.54  | 19 | 3 | 3 | 1.00:0.58  | 17302  |
| Vinculin                                    | P18206  | VINC/VCL        | 13.08  | 7  | 4 | 4 | 1.00:3.12  | 123799 |
| Moesin                                      | P26038  | MOES/MSN        | 15.3   | 10 | 6 | 6 | 1.00:3.19  | 67820  |
| Actin cytoplasmic 1                         | P60709* | ACTB/ ACTB      | 56.91  | 5  | 1 | 1 | 1.00:0.46  | 41737  |
| Thymosin beta-4                             | P62328  | TYB4/TMSB4X     | 200    | 16 | 1 | 1 | 1.00:0.31  | 5053   |
| Thymosin beta-10                            | P63313  | TYB10/TMSB10    | 200    | 16 | 1 | 1 | 1.00:0.31  | 5026   |
| LIM and SH3 domain protein 1                | Q14847  | LASP1/LASP1     | 13.46  | 22 | 6 | 6 | 1.00:0.42  | 29717  |
| <b><i>DNA-binding</i></b>                   |         |                 |        |    |   |   |            |        |
| Proliferating cell nuclear antigen          | P12004  | PCNA/PCNA       | 200    | 15 | 5 | 5 | 1.00:5.27  | 28769  |
| Transcription factor BTF3                   | P20290  | BTF3/BTF3       | 23.93  | 7  | 2 | 2 | 1.00:0.06  | 22168  |
| Catenin beta-1                              | P35222  | CTNB1/CTNNB1    | 31.62  | 7  | 3 | 3 | 1.00:4.29  | 85497  |
| Cytoplasmic dynein                          | Q14204  | DYHC1/DYNC1H1   | 34.98  | 1  | 2 | 2 | 1.00:4.24  | 532412 |
| <b><i>Metabolic enzyme</i></b>              |         |                 |        |    |   |   |            |        |
| Aspartate aminotransferase mitochondrial    | P00505  | AATM/GOT2       | 29.2   | 4  | 2 | 2 | 1.00:2.09  | 47518  |
| Inosine-5'-monophosphate dehydrogenase 2    | P12268  | IMDH2/IMPDH2    | 51.27  | 2  | 1 | 1 | 1.00:0.54  | 55805  |
| Phosphoglycerate mutase 1                   | P18669  | PGAM1/PGAM1     | 77.72  | 7  | 1 | 1 | 1.00:2.19  | 28804  |
| Transketolase                               | P29401  | TKT/TKT         | 29.33  | 4  | 2 | 2 | 1.00:2.39  | 67878  |
| Peroxiredoxin-2                             | P32119  | PRDX2/PRDX2     | 16.56  | 17 | 3 | 3 | 1.00:1.41  | 21892  |
| Transaldolase                               | P37837  | TALDO/TALDO1    | 15.61  | 6  | 2 | 2 | 1.00:0.30  | 37540  |
| Electron transfer flavoprotein subunit beta | P38117  | ETFB/ETFB       | 15.38  | 7  | 2 | 2 | 1.00:4.17  | 27844  |



|                                                 |         |              |       |    |   |   |            |        |
|-------------------------------------------------|---------|--------------|-------|----|---|---|------------|--------|
| Triosephosphate isomerase                       | P60174  | TPIS/TPI1    | 26.09 | 47 | 9 | 9 | 1.00:0.61  | 26669  |
| Dihydropyrimidinase-related protein 2           | Q16555  | DPYL2/DPYSL2 | 13.03 | 1  | 1 | 1 | 1.00:0.49  | 62294  |
| Probable phosphoglycerate mutase 4              | Q8N0Y7  | PGAM4/PGAM4  | 77.72 | 7  | 1 | 1 | 1.00:2.19  | 28777  |
| <i>Nuclear protein</i>                          |         |              |       |    |   |   |            |        |
| Prothymosin alpha                               | P06454  | PTMA/PTMA    | 200   | 13 | 1 | 1 | 1.00:0.28  | 12203  |
| Apoptosis inhibitor 5                           | Q9BZZ5  | API5/API5    | 47.73 | 9  | 2 | 2 | 1.00:1.93  | 59005  |
| <i>Peripheral membrane protein</i>              |         |              |       |    |   |   |            |        |
| Clathrin heavy chain 2                          | P53675  | CLH2/CLTCL1  | 60.29 | 1  | 1 | 1 | 1.00:1.74  | 187029 |
| Clathrin heavy chain 1                          | Q00610  | CLH1/CLTC    | 60.29 | 3  | 3 | 3 | 1.00:2.11  | 191613 |
| <i>Ubiquitin-protein ligase</i>                 |         |              |       |    |   |   |            |        |
| Proteasome subunit alpha type 1                 | P25786  | PSA1/PSMA1   | 19.81 | 3  | 1 | 1 | 1.00:64.00 | 29556  |
| 26S proteasome non-ATPase regulatory subunit 13 | Q9UNM6  | PSD13/PSMD13 | 19.84 | 6  | 2 | 2 | 1.00:14.82 | 42946  |
| <i>Ribosomal protein</i>                        |         |              |       |    |   |   |            |        |
| 60S acidic ribosomal protein P2                 | P05387  | RLA2/RPLP2   | 14.95 | 46 | 3 | 3 | 1.00:0.37  | 11665  |
| 40S ribosomal protein S12                       | P25398  | RS12/RPS12   | 22.29 | 24 | 2 | 2 | 1.00:3.53  | 14515  |
| 40S ribosomal protein S27                       | P42677  | RS27/RPS27   | 200   | 10 | 1 | 1 | 1.00:4.90  | 9461   |
| 40S ribosomal protein S9                        | P46781  | RS9/RPS9     | 36.93 | 28 | 6 | 6 | 1.00:3.66  | 22591  |
| 40S ribosomal protein S10                       | P46783  | RS10/RPS10   | 34.17 | 11 | 2 | 2 | 1.00:0.06  | 18898  |
| 40S ribosomal protein S20                       | P60866  | RS20/RPS20   | 31.23 | 15 | 2 | 2 | 1.00:9.14  | 13373  |
| 40S ribosomal protein S3a                       | P61247  | RS3A/RPS3A   | 15.4  | 3  | 1 | 1 | 1.00:1.35  | 29945  |
| 60S ribosomal protein L26                       | P61254  | RL26/RPL26   | 13.63 | 12 | 2 | 2 | 1.00:4.63  | 17258  |
| 40S ribosomal protein S11                       | P62280  | RS11/RPS11   | 66.24 | 20 | 4 | 4 | 1.00:2.05  | 18431  |
| 60S ribosomal protein L7a                       | P62424* | RL7A/RPL7A   | 36.44 | 20 | 5 | 5 | 1.00:0.60  | 29996  |
| 40S ribosomal protein S6                        | P62753  | RS6/RPS6     | 16.53 | 12 | 3 | 3 | 1.00:3.74  | 28681  |



|                                                      |        |               |        |    |    |    |           |        |
|------------------------------------------------------|--------|---------------|--------|----|----|----|-----------|--------|
| 40S ribosomal protein S15                            | P62841 | RS15/RPS15    | 32.42  | 15 | 1  | 1  | 1.00:2.40 | 17040  |
| 40S ribosomal protein S28                            | P62857 | RS28/RPS28    | 16.26  | 33 | 2  | 2  | 1.00:0.46 | 7841   |
| 60S ribosomal protein L10a                           | P62906 | RL10A/RPL10A  | 127.29 | 4  | 1  | 1  | 1.00:2.77 | 24831  |
| 60S ribosomal protein L8                             | P62917 | RL8/RPL8      | 14.42  | 4  | 1  | 1  | 1.00:4.58 | 28025  |
| 60S ribosomal protein L6                             | Q02878 | RL6/RPL6      | 25.24  | 14 | 4  | 4  | 1.00:1.51 | 32728  |
| 40S ribosomal protein S27-like                       | Q71UM5 | RS27L/RPS27L  | 200    | 10 | 1  | 1  | 1.00:4.90 | 9477   |
| 60S ribosomal protein L26-like 1                     | Q9UNX3 | RL26L/RPL26L1 | 13.63  | 12 | 2  | 2  | 1.00:4.63 | 17256  |
| RNA-binding                                          |        |               |        |    |    |    |           |        |
| Eukaryotic translation initiation factor 3 subunit F | O00303 | EIF3F/EIF3F   | 150.51 | 5  | 1  | 1  | 1.00:5.18 | 37564  |
| Splicing factor proline- and glutamine-rich          | P23246 | SFPQ/SFPQ     | 66.28  | 3  | 2  | 2  | 1.00:3.52 | 76150  |
| Elongation factor 1-gamma                            | P26641 | EF1G/EEF1G    | 20.26  | 19 | 9  | 9  | 1.00:1.58 | 50119  |
| Heterogeneous nuclear ribonucleoprotein M            | P52272 | HNRPM/HNRNPM  | 30.3   | 5  | 5  | 5  | 1.00:1.58 | 77516  |
| Heterogeneous nuclear ribonucleoprotein K            | P61978 | HNRPK/HNRNPK  | 13.1   | 26 | 11 | 11 | 1.00:0.59 | 50976  |
| Eukaryotic translation initiation factor 5A-1        | P63241 | IF5A1/EIF5A   | 53.79  | 41 | 5  | 5  | 1.00:0.53 | 16832  |
| Serine/arginine-rich splicing factor 3               | P84103 | SRSF3/SRSF3   | 33.26  | 12 | 2  | 2  | 1.00:0.49 | 19330  |
| Serine/arginine-rich splicing factor 4               | Q08170 | SRSF4/SRSF4   | 15.45  | 3  | 2  | 2  | 1.00:2.85 | 56678  |
| ATP-dependent RNA helicase A                         | Q08211 | DHX9/DHX9     | 14.57  | 4  | 2  | 2  | 1.00:3.20 | 140958 |
| Serine/arginine-rich splicing factor 5               | Q13243 | SRSF5/SRSF5   | 15.45  | 3  | 1  | 1  | 1.00:1.93 | 31264  |
| Serine/arginine-rich splicing factor 6               | Q13247 | SRSF6/SRSF6   | 15.45  | 5  | 2  | 2  | 1.00:2.31 | 39587  |
| Non-POU domain-containing octamer-binding protein    | Q15233 | NONO/NONO     | 14.67  | 10 | 4  | 4  | 1.00:1.51 | 54232  |
| Poly(rC)-binding protein 1                           | Q15365 | PCBP1/PCBP1   | 14.11  | 6  | 2  | 2  | 1.00:4.17 | 37498  |
| Poly(rC)-binding protein 2                           | Q15366 | PCBP2/PCBP2   | 19.01  | 7  | 2  | 2  | 1.00:1.76 | 38580  |
| Eukaryotic translation initiation factor 5A-1-like   | Q6IS14 | IF5AL/EIF5AL1 | 53.79  | 36 | 4  | 4  | 1.00:0.53 | 16773  |
| Pre-mRNA-processing-splicing factor 8                | Q6P2Q9 | PRP8/PRPF8    | 15.59  | 1  | 1  | 1  | 1.00:4.93 | 273599 |



|                                                       |        |              |        |    |   |   |           |        |
|-------------------------------------------------------|--------|--------------|--------|----|---|---|-----------|--------|
| Plasminogen activator inhibitor 1 RNA-binding protein | Q8NC51 | PAIRB/SERBP1 | 85.16  | 7  | 2 | 2 | 1.00:0.44 | 44965  |
| Eukaryotic translation initiation factor 5A-2         | Q9GZV4 | IF5A2/EIF5A2 | 53.79  | 18 | 3 | 3 | 1.00:0.53 | 16793  |
| Scaffold protein                                      |        |              |        |    |   |   |           |        |
| Ran-specific GTPase-activating protein                | P43487 | RANG/RANBP1  | 128.06 | 8  | 2 | 2 | 1.00:8.56 | 23310  |
| Transport protein                                     |        |              |        |    |   |   |           |        |
| ADP-ribosylation factor 4                             | P18085 | ARF4/ ARF4   | 27.05  | 19 | 3 | 3 | 1.00:4.45 | 20511  |
| Exportin-2                                            | P55060 | XPO2/CSE1L   | 200    | 11 | 6 | 6 | 1.00:3.54 | 110417 |
| Transitional endoplasmic reticulum ATPase             | P55072 | TERA/VCP     | 17.83  | 2  | 1 | 1 | 1.00:8.42 | 89322  |
| Importin subunit beta 1                               | Q14974 | IMB1/KPNB1   | 17.63  | 4  | 3 | 3 | 1.00:1.57 | 97170  |

DEPs with \* overlapped with SW620 cells.

**Supplementary Table S4.** STRING clustering of DEPs and first shell interactors in MS17-treated SW480 cells with the respective clusters and protein classes upon 8.2μM of MS17 treatment for 24 hours.

| Protein Cluster/Protein Name               | Gene Symbol | Protein Symbol | Protein Class            |
|--------------------------------------------|-------------|----------------|--------------------------|
| <i>Cluster 1</i>                           |             |                |                          |
| Activator of HSP90 ATPase Activity 1*      | AHSA1       | AHSA1          | Chaperone                |
| HSP90 co-chaperone CDC37*                  | CDC37       | CDC37          | Chaperone                |
| Heat shock protein HSP 90-alpha            | HSP90AA1    | HS90A          | Chaperone                |
| Heat shock 70 kDa protein 1A               | HSPA1A      | HS71A          | Chaperone                |
| Heat shock 70 kDa protein 1B               | HSPA1B      | HS71B          | Chaperone                |
| Endoplasmic reticulum chaperone BiP        | HSPA5       | BIP            | Chaperone                |
| 10 kDa heat shock protein, mitochondrial   | HSPE1       | CH10           | Chaperone                |
| High mobility group protein B1             | HMGB1       | HMGB1          | Chromatin-regulatory     |
| Actin, cytoplasmic 1                       | ACTB        | ACTB           | Cytoskeletal protein     |
| Profilin-1*                                | PFN1        | PFN1           | Cytoskeletal protein     |
| Peptidyl-prolyl cis-trans isomerase        | FKBP4       | FKBP4          | Metabolic enzyme         |
| Neuron navigator 3                         | NAV3        | NAV3           | Nuclear membrane protein |
| Nuclear transport factor 2*                | NUTF2       | NTF2           | Transport protein        |
| Serpin H1                                  | SERPINH1    | SERPINH1       | Chaperone                |
| E3 ubiquitin-protein ligase CHIP*          | STUB1       | CHIP           | Ubiquitin-protein ligase |
| <i>Cluster 2</i>                           |             |                |                          |
| Protein S100-A6                            | S100A6      | S10A6          | Calcium signaling        |
| Pyruvate kinase PKLR                       | PKLR        | KPYR           | Metabolic enzyme         |
| Pyruvate kinase PKM                        | PKM         | KPYM           | Metabolic enzyme         |
| Ribosomal protein L18a*                    | RPL18A      | RL18A          | Ribosomal protein        |
| Ribosomal protein L19*                     | RPL19       | RL19           | Ribosomal protein        |
| Ribosomal protein L7a                      | RPL7A       | RL7A           | Ribosomal protein        |
| Ribosomal protein S12*                     | RPS12       | RS12           | Ribosomal protein        |
| Ubiquitin-40S ribosomal protein S27a       | RPS27A      | RPS27A         | Ribosomal protein        |
| Ubiquitin-60S ribosomal protein L40        | UBA52       | RL40           | Ribosomal protein        |
| ATP binding cassette subfamily A member 13 | ABCA13      | ABCAD          | Transport protein        |



|                                          |      |      |                          |
|------------------------------------------|------|------|--------------------------|
| GTP-binding nuclear protein Ran          | RAN  | RAN  | Transport protein        |
| Polyubiquitin-B                          | UBB  | UBB  | Ubiquitin-protein ligase |
| Polyubiquitin-C                          | UBC  | UBC  | Ubiquitin-protein ligase |
| Ubiquitin carboxyl-terminal hydrolase 5* | USP5 | USP5 | Ubiquitin-protein ligase |

Proteins with \*: First shell protein interactor determined by STRING Network.

**Supplementary Table S5.** STRING clustering of 92 DEPs in MS17-treated SW620 cells with the respective clusters and protein classes upon 5μM of MS17 treatment for 24 hours.

| Protein Cluster/Protein Name                           | Gene Symbol | Protein Symbol | Protein Class     |
|--------------------------------------------------------|-------------|----------------|-------------------|
| <i>Cluster 1</i>                                       |             |                |                   |
| Transcription factor BTF3*                             | BTF3        | BTF3           | DNA-binding       |
| Proliferating cell nuclear antigen                     | PCNA        | PCNA           | DNA-binding       |
| 60S ribosomal protein L10a                             | RPL10A      | RL10A          | Ribosomal protein |
| 60S ribosomal protein L26                              | RPL26       | RL26           | Ribosomal protein |
| Ribosomal protein L26 like 1                           | RPL26L1     | RL26L1         | Ribosomal protein |
| 60S ribosomal protein L6                               | RPL6        | RL6            | Ribosomal protein |
| Ribosomal protein L7a                                  | RPL7A       | RL7A           | Ribosomal protein |
| 60S ribosomal protein L8                               | RPL8        | RL8            | Ribosomal protein |
| 60S acidic ribosomal protein P2*                       | RPLP2       | RLA2           | Ribosomal protein |
| 40S ribosomal protein S10*                             | RPS10       | RS10           | Ribosomal protein |
| Ribosomal protein S11                                  | RPS11       | RS11           | Ribosomal protein |
| Ribosomal protein S12                                  | RPS12       | RS12           | Ribosomal protein |
| Ribosomal protein S15                                  | RPS15       | RS15           | Ribosomal protein |
| Ribosomal protein S20                                  | RPS20       | RS20           | Ribosomal protein |
| 40S ribosomal protein S27                              | RPS27       | RS27           | Ribosomal protein |
| Ribosomal protein S27 like                             | RPS27L      | RS27L          | Ribosomal protein |
| Ribosomal protein S28*                                 | RPS28       | RS28           | Ribosomal protein |
| 40S ribosomal protein S3a                              | RPS3A       | RS3A           | Ribosomal protein |
| 40S ribosomal protein S6                               | RPS6        | RS6            | Ribosomal protein |
| Ribosomal protein S9                                   | RPS9        | RS9            | Ribosomal protein |
| Plasminogen activator inhibitor 1 RNA-binding protein* | SERBP1      | PAIRB          | Ribosomal protein |
| Eukaryotic translation initiation factor 3 subunit F   | EIF3F       | EIF3F          | RNA-binding       |
| Eukaryotic translation initiation factor 5A-1*         | EIF5A       | IF5A1          | RNA-binding       |
| Eukaryotic translation initiation factor 5A-2*         | EIF5A2      | IF5A2          | RNA-binding       |
| Eukaryotic translation initiation factor 5A-1-like*    | EIF5AL1     | IF5AL          | RNA-binding       |
| Electron transfer flavoprotein subunit beta            | ETFB        | ETFB           | Metabolic enzyme  |
| ADP-ribosylation factor 4                              | ARF4        | ARF4           | Transport protein |
| <i>Cluster 2</i>                                       |             |                |                   |
| Calreticulin*                                          | CALR        | CALR           | Chaperone         |
| T-complex protein 1 subunit eta                        | CCT7        | TCPH           | Chaperone         |
| T-complex protein 1 subunit theta                      | CCT8        | TCPQ           | Chaperone         |
| DnaJ homolog subfamily A member 1                      | DNAJA1      | DNAJ1          | Chaperone         |
| Heat shock protein HSP 90-beta                         | HSP90AB1    | HS90B          | Chaperone         |



|                                                 |        |       |                          |
|-------------------------------------------------|--------|-------|--------------------------|
| Heat shock 70 kDa protein 1A                    | HSPA1A | HS71A | Chaperone                |
| Heat shock 70 kDa protein 1B                    | HSPA1B | HS71B | Chaperone                |
| Stress-70 protein, mitochondrial*               | HSPA9  | GRP75 | Chaperone                |
| Heat shock protein 105 kDa                      | HSPH1  | HS105 | Chaperone                |
| Nucleophosmin                                   | NPM1   | NPM   | Chaperone                |
| Parkinson disease protein 7                     | PARK7  | PARK7 | Chaperone                |
| Prefoldin subunit 6                             | PFDN6  | PFD6  | Chaperone                |
| Exportin-2                                      | CSE1L  | XPO2  | Transport protein        |
| Importin subunit beta 1                         | KPNB1  | IMB1  | Transport protein        |
| Transitional endoplasmic reticulum ATPase       | VCP    | TERA  | Transport protein        |
| Calmodulin-3                                    | CALM3  | CALM3 | Calcium signaling        |
| Calmodulin-like protein 3                       | CALML3 | CALL3 | Calcium signaling        |
| Proteasome subunit alpha type 1                 | PSMA1  | PSA1  | Ubiquitin-protein ligase |
| 26S proteasome non-ATPase regulatory subunit 13 | PSMD13 | PSD13 | Ubiquitin-protein ligase |
| LIM and SH3 domain protein 1*                   | LASP1  | LASP1 | Cytoskeletal protein     |
| Inosine-5'-monophosphate dehydrogenase 2*       | IMPDH2 | IMDH2 | Metabolic enzyme         |
| Elongation factor 1-gamma                       | EEF1G  | EEF1G | RNA-binding              |
| Ran-specific GTPase-activating protein          | RANBP1 | RANG  | Scaffold protein         |

#### *Cluster 3*

|                                                   |        |       |                      |
|---------------------------------------------------|--------|-------|----------------------|
| ATP-dependent RNA helicase A                      | DHX9   | DHX9  | RNA-binding          |
| Heterogeneous nuclear ribonucleoprotein K*        | HNRNPK | HNRPK | RNA-binding          |
| Heterogeneous nuclear ribonucleoprotein M         | HNRNPM | HNRPM | RNA-binding          |
| Non-POU domain-containing octamer-binding protein | NONO   | NONO  | RNA-binding          |
| Poly(rC)-binding protein 1                        | PCBP1  | PCBP1 | RNA-binding          |
| Poly(rC)-binding protein 2                        | PCBP2  | PCBP2 | RNA-binding          |
| Pre-mRNA-processing-splicing factor 8             | PRPF8  | PRP8  | RNA-binding          |
| Splicing factor, proline- and glutamine-rich      | SFPQ   | SFPQ  | RNA-binding          |
| Serine/arginine-rich splicing factor 3*           | SRSF3  | SRSF3 | RNA-binding          |
| Serine/arginine-rich splicing factor 4            | SRSF4  | SRSF4 | RNA-binding          |
| Serine/arginine-rich splicing factor 5            | SRSF5  | SRSF5 | RNA-binding          |
| Serine/arginine-rich splicing factor 6            | SRSF6  | SRSF6 | RNA-binding          |
| Histone H1.2*                                     | H1.2   | H1-2  | Chromatin-regulatory |
| Histone H1.3*                                     | H1.3   | H1-3  | Chromatin-regulatory |
| Keratin, type II cytoskeletal 7*                  | KRT7   | K2C7  | Cytoskeletal protein |
| Apoptosis Inhibitor 5                             | API5   | API5  | Nuclear protein      |

#### *Cluster 4*

|                                    |         |       |                      |
|------------------------------------|---------|-------|----------------------|
| Actin, cytoplasmic 1*              | ACTB    | ACTB  | Cytoskeletal protein |
| Alpha-actinin-1                    | ACTN1   | ACTN1 | Cytoskeletal protein |
| Plastin-2                          | LCP1    | PLSL  | Cytoskeletal protein |
| Moesin                             | MSN     | MOES  | Cytoskeletal protein |
| Thymosin beta-10*                  | TMSB10  | TYB10 | Cytoskeletal protein |
| Thymosin beta 4*                   | TMSB4X  | TYB4  | Cytoskeletal protein |
| Vinculin                           | VCL     | VINC  | Cytoskeletal protein |
| Catenin beta 1                     | CTNNB1  | CTNB1 | DNA-binding          |
| Cytoplasmic dynein 1 heavy chain 1 | DYNC1H1 | DYHC1 | DNA-binding          |



|                                           |        |       |                             |
|-------------------------------------------|--------|-------|-----------------------------|
| Clathrin heavy chain 1                    | CLTC   | CLH1  | Peripheral membrane protein |
| Clathrin heavy chain 2                    | CLTCL1 | CLH2  | Peripheral membrane protein |
| Annexin A1                                | ANXA1  | ANXA1 | Calcium signaling           |
| Heat shock protein 75 kDa, mitochondrial  | TRAP1  | TRAP1 | Chaperone                   |
| Prothymosin alpha*                        | PTMA   | PTMA  | Nuclear protein             |
| <b>Cluster 5</b>                          |        |       |                             |
| Dihydropyrimidinase-related protein 2*    | DPYSL2 | DPYL2 | Metabolic enzyme            |
| Aspartate aminotransferase, mitochondrial | GOT2   | AATM  | Metabolic enzyme            |
| Phosphoglycerate mutase 1                 | PGAM1  | PGAM1 | Metabolic enzyme            |
| Phosphoglycerate mutase family member 4   | PGAM4  | PGAM4 | Metabolic enzyme            |
| Peroxiredoxin-2                           | PRDX2  | PRDX2 | Metabolic enzyme            |
| Transaldolase*                            | TALDO1 | TALDO | Metabolic enzyme            |
| Transketolase                             | TKT    | TKT   | Metabolic enzyme            |
| Triosephosphate isomerase*                | TPI1   | TPIS  | Metabolic enzyme            |
| Calmodulin-1                              | CALM1  | CALM1 | Calcium signaling           |
| Calmodulin 2                              | CALM2  | CALM2 | Calcium signaling           |
| Stathmin*                                 | STMN1  | STMN1 | Cytoskeletal protein        |

DEPs with \*: downregulated in MS17-treated SW620 cells.
